# Supplementary material for: Exploring the spatiotemporal changes in carbon storage under different development scenarios in Jiangsu Province, China
Source: PeerJ. 2022 May 13;10:e13411. doi: 10.7717/peerj.13411 (PMC9109690; doi:10.7717/peerj.13411)
Supplement: Table S1 [file peerj-10-13411-s001.xlsx]

## Sheet: Sheet1
LULC	2000	2015	2050
			BD	FD	SD	HD
Cropland	70069	66287	65373	59864	66234	66063
Forest land	3361	3308	3186	1056	3281	3186
Grassland	922	919	666	433	856	746
Water body	12257	12466	12466	12466	12466	12466
Construction land	14289	17905	19209	27086	18064	18439
Bare land	18	31	16	11	15	16
