# Supplementary material for: Exploring the spatiotemporal changes in carbon storage under different development scenarios in Jiangsu Province, China
Source: PeerJ. 2022 May 13;10:e13411. doi: 10.7717/peerj.13411 (PMC9109690; doi:10.7717/peerj.13411)
Supplement: Table S2 [file peerj-10-13411-s002.xlsx]

## Sheet: Sheet1
LULC	AGC	BGC	SOC	DOC
Cropland	0.54	0	8.67	0
Forest land	2.65	0	11.3	0
Grassland	0.34	0	9.92	0
Water body	1.78	0	8.94	0
Construction land	0.48	0	8.1	0
Bare land	0	0	5.1	0
