# Supplementary material for: Exploring the spatiotemporal changes in carbon storage under different development scenarios in Jiangsu Province, China
Source: PeerJ. 2022 May 13;10:e13411. doi: 10.7717/peerj.13411 (PMC9109690; doi:10.7717/peerj.13411)
Supplement: Table S3 [file peerj-10-13411-s003.xlsx]

## Sheet: Sheet1
LULC		2015
		Cropland	Forest land	Grassland	Water body	Construction land	Bare land
2000	Cropland	66080	18	15	470	3485	1
	Forest land	2	3289	2	1	66	1
	Grassland	42	0	818	37	25	0
	Water body	108	0	70	11934	132	13
	Construction land	55	0	14	22	14197	1
	Bare land	0	1	0	2	0	15
